# Supplementary material for: Impact of tocilizumab therapy on antibody response to influenza vaccine in patients with rheumatoid arthritis
Source: PubMed Central journal article supplement — Ann Rheum Dis. 2012 Aug 11;71(12):2006–10. doi: 10.1136/annrheumdis-2012-201950 (PMC3595981; doi:10.1136/annrheumdis-2012-201950), 2012-08-11
Supplement: annrheumdis-2012-201950-s1.pdf [file annrheumdis-2012-201950-s1.pdf]

**Table S1.** Predictors of seroresponse for three influenza strains in RA patients

| Strain            | ORs  | 95% CI    | <i>p</i> |
|-------------------|------|-----------|----------|
| A/H1N1            |      |           |          |
| Prior vaccination | 0.38 | 0.19-0.76 | 0.006    |
| Prednisolone use  | 1.87 | 0.95-3.68 | 0.071    |
| A/H3N2            |      |           |          |
| Prior vaccination | 0.29 | 0.15-0.59 | 0.01     |
| MTX use           | 0.53 | 0.29-0.97 | 0.04     |
| B/B1              |      |           |          |
| Prior vaccination | 0.22 | 0.11-0.44 | < 0.0001 |
| MTX use           | 0.60 | 0.30-1.06 | 0.075    |

In multivariate logistic regression analysis, seroresponse was used as the response variable for each influenza strain. Age, prior influenza vaccination (2010/2011), RA duration, positive anti-CCP Abs status, positive RF status, CDAI, current MTX use, current prednisolone use, ongoing TCZ use, and lymphocyte counts (< 1000/ $\mu$ l) were entered as the predictor variables (independent variables). The ROC-AUC values for the models to predict seroresponse were 0.62 (95% CI 0.54-0.70,  $p = 0.03$ ) for the A/H1N1 strain; 0.66 (95% CI 0.58-0.74,  $p < 0.005$ ) for the A/H3N2 strain; and 0.67 (95% CI 0.59-0.75,  $p < 0.005$ ) for the B strain, respectively.

RA, rheumatoid arthritis; MTX, methotrexate; TCZ, tocilizumab; RF, rheumatoid factor; anti-CCP Abs, anti-cyclic citrullinated peptide antibodies; CDAI, clinical disease activity index; ORs, odds ratios; 95% CI, 95% confidence interval; ROC-AUC, area under the receiver operating characteristic curve.
